# Supplementary material for: Sex-biased islet β cell dysfunction is caused by the MODY MAFA S64F variant by inducing premature aging and senescence in males
Source: bioRxiv or medRxiv preprint supplement (doi:10.1101/2020.06.29.177527), 2021-01-06
Supplement: Supplementary file [file media-1.pdf]

# Male

# Female

3 weeks

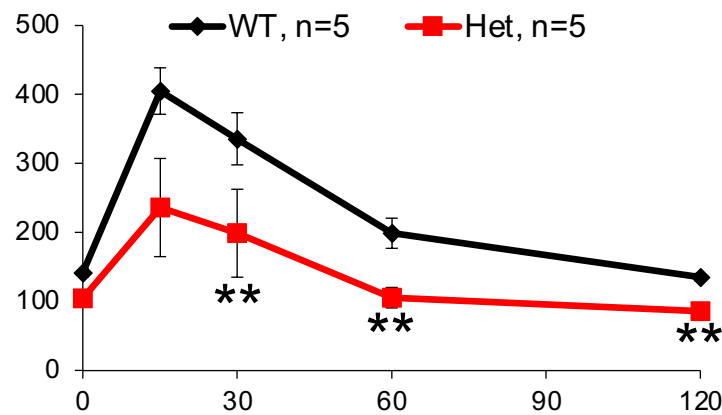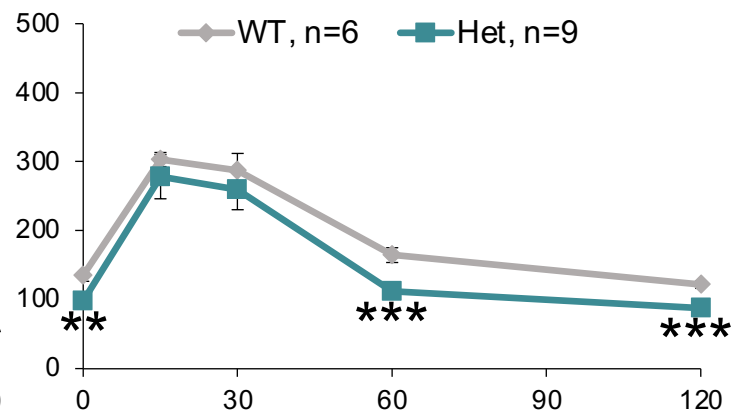

6 weeks

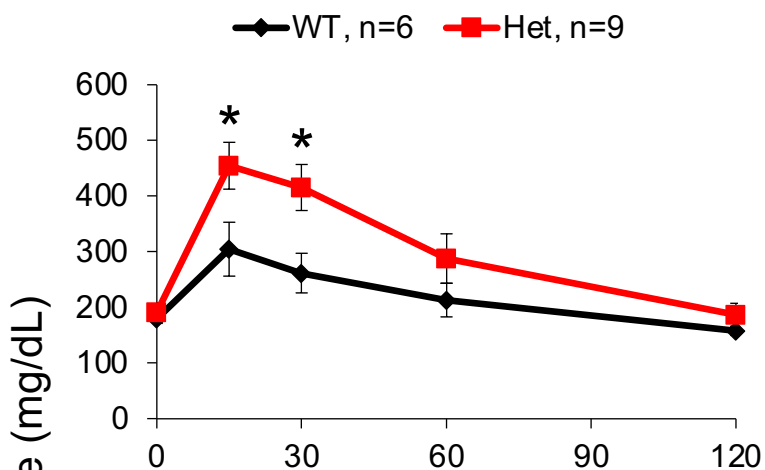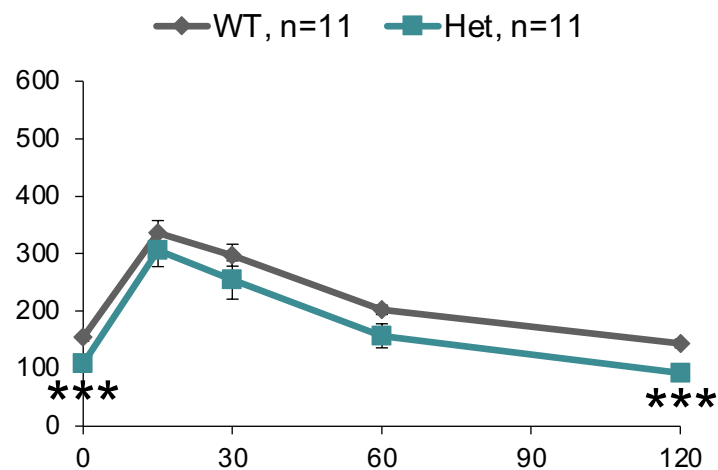

7 weeks

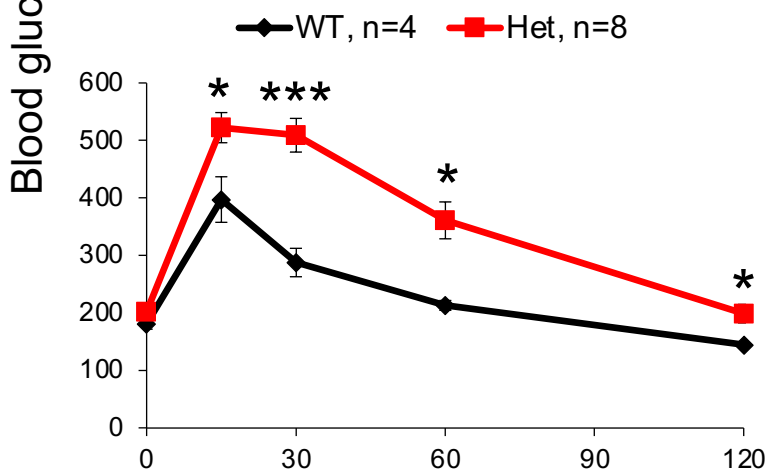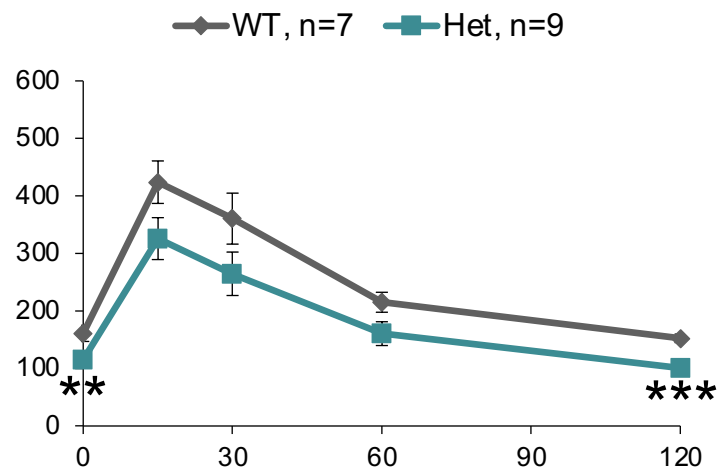

16 weeks

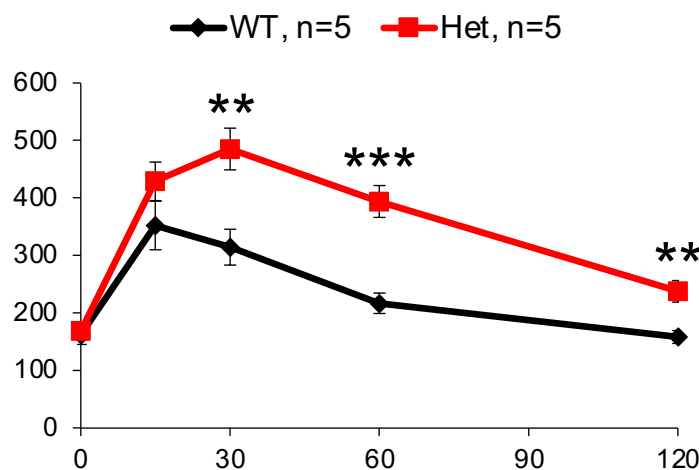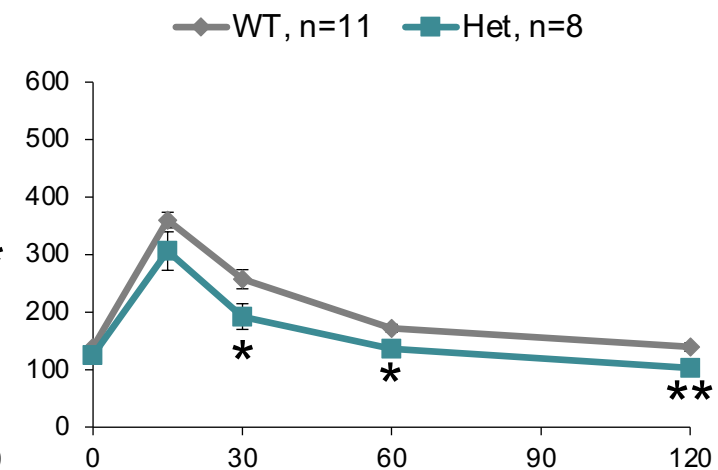

Time post-glucose injection (min)

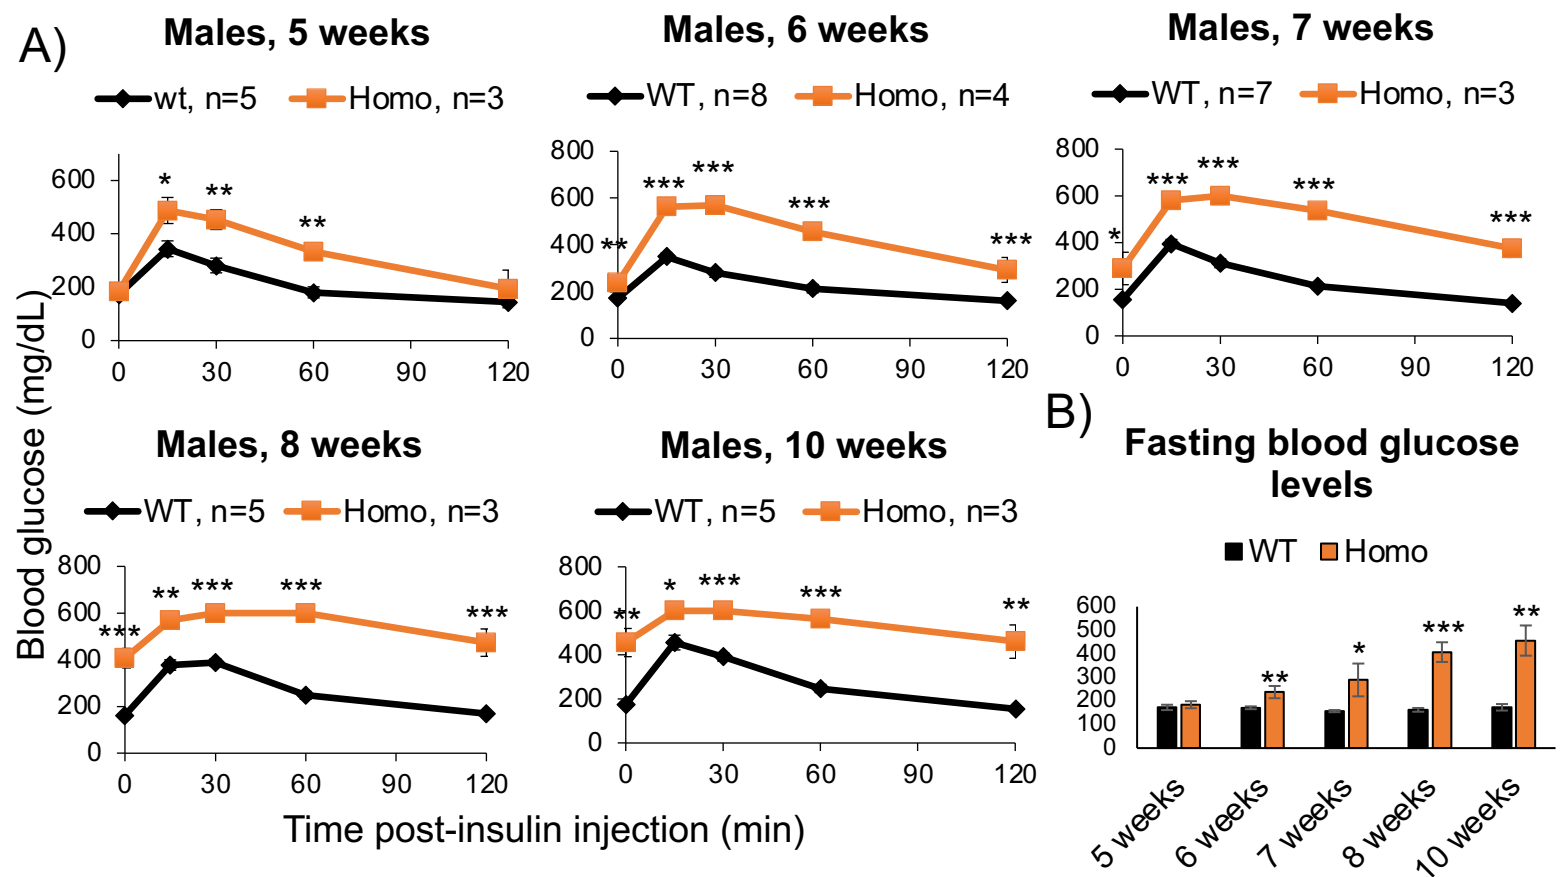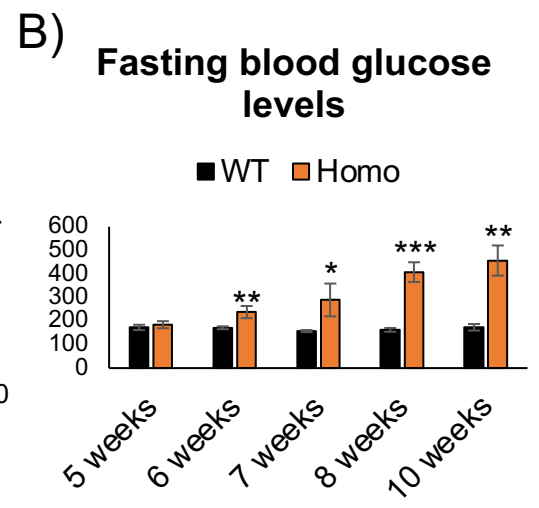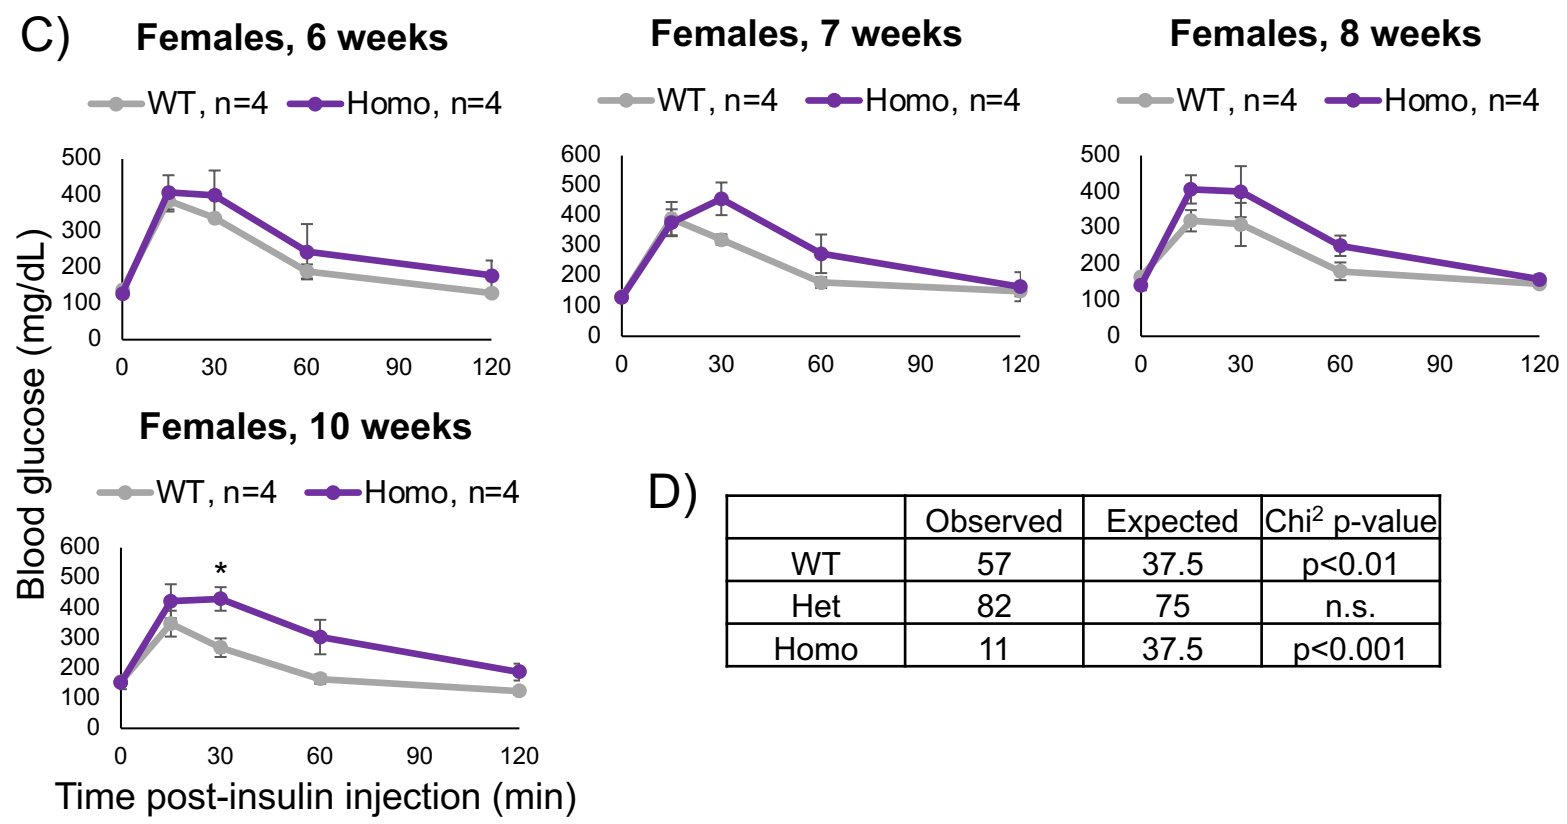

**D)**

|      | Observed | Expected | Chi <sup>2</sup> p-value |
|------|----------|----------|--------------------------|
| WT   | 57       | 37.5     | p<0.01                   |
| Het  | 82       | 75       | n.s.                     |
| Homo | 11       | 37.5     | p<0.001                  |

Supplemental Figure 2

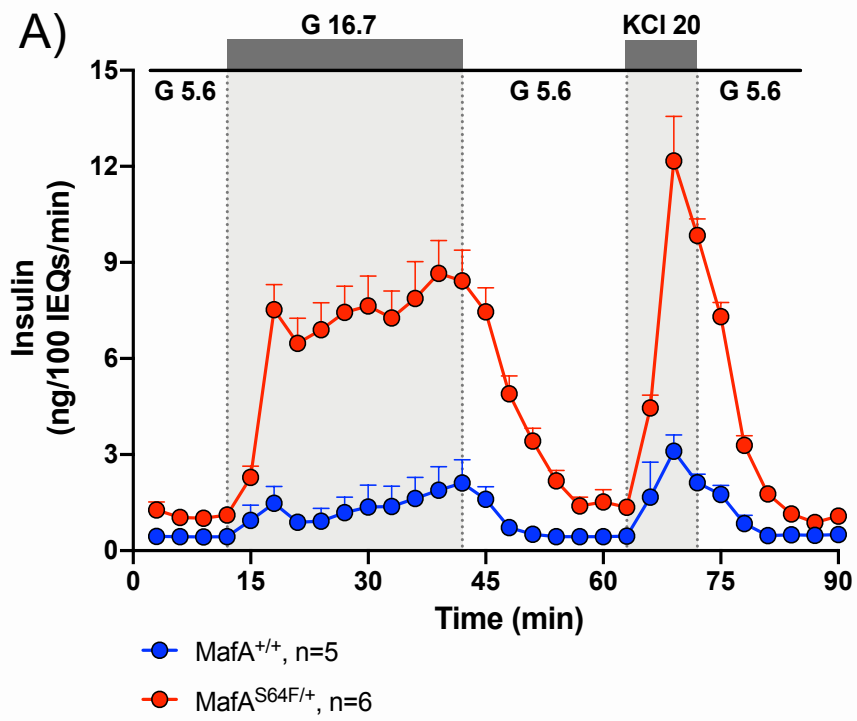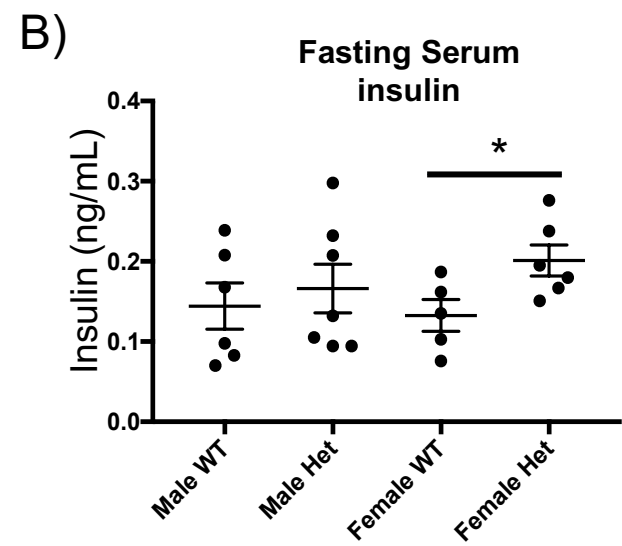

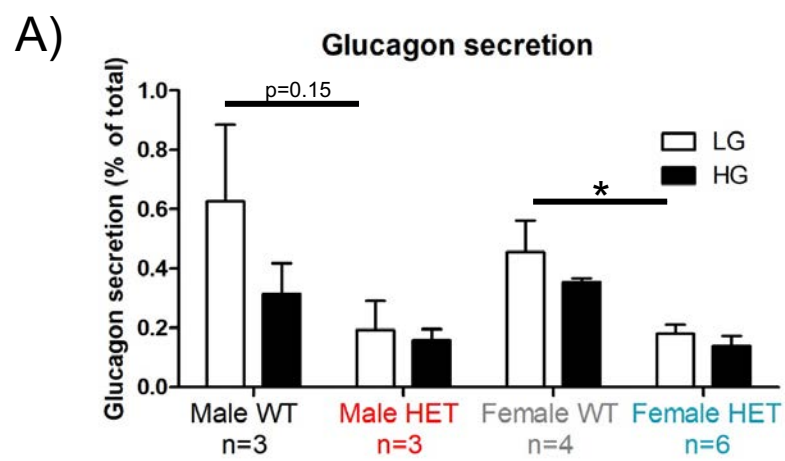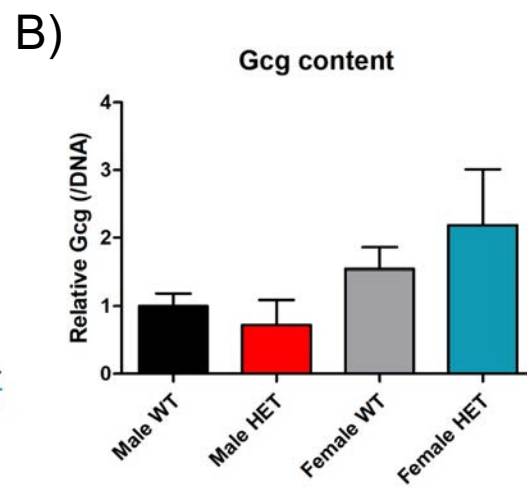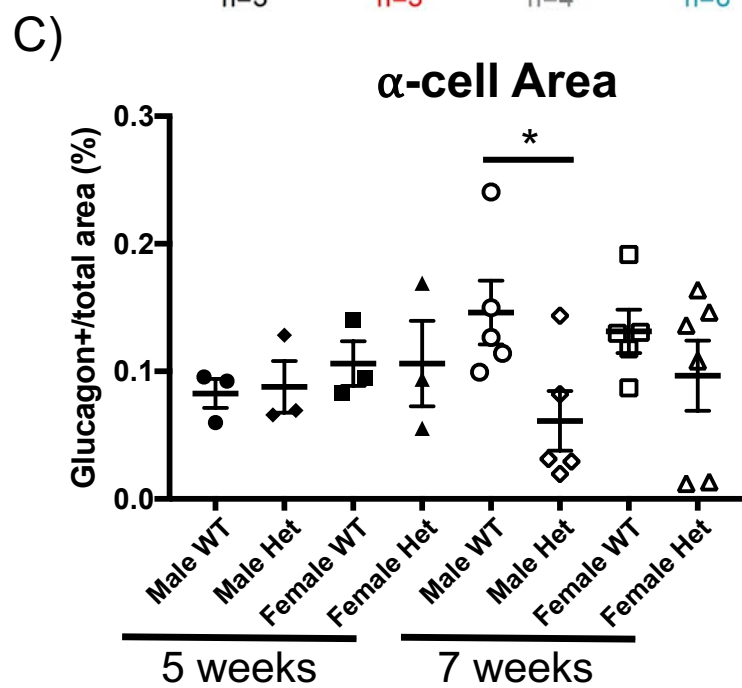

**KI67** **Insulin** **DAPI**

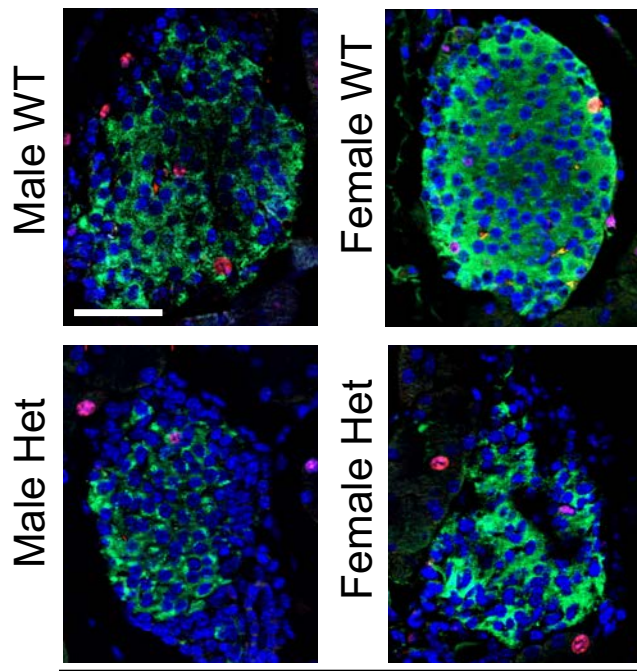

4 weeks

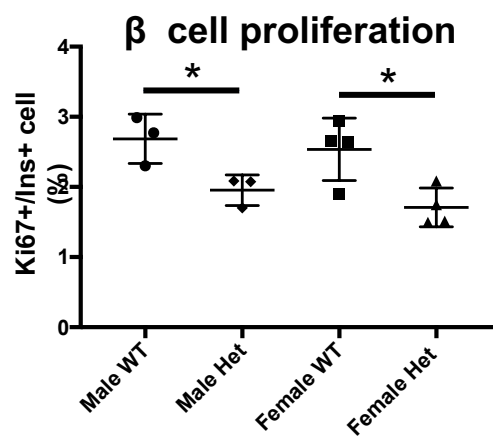

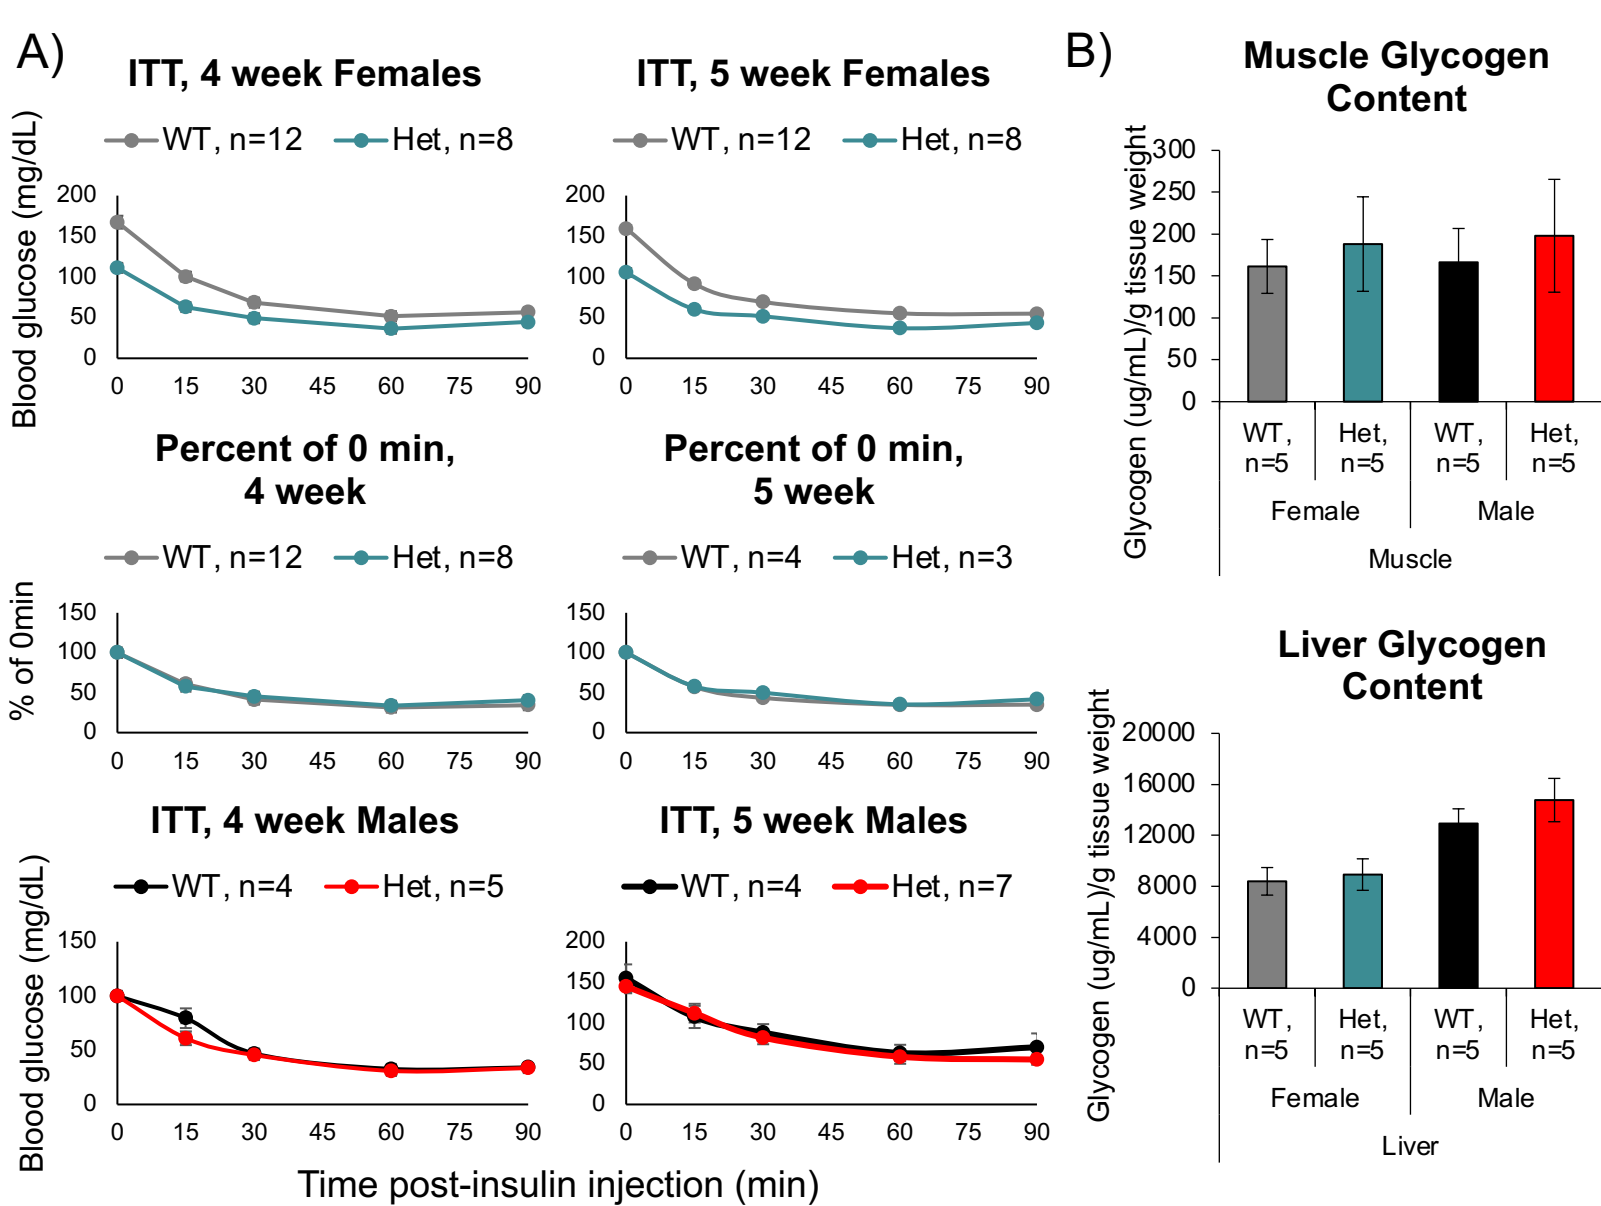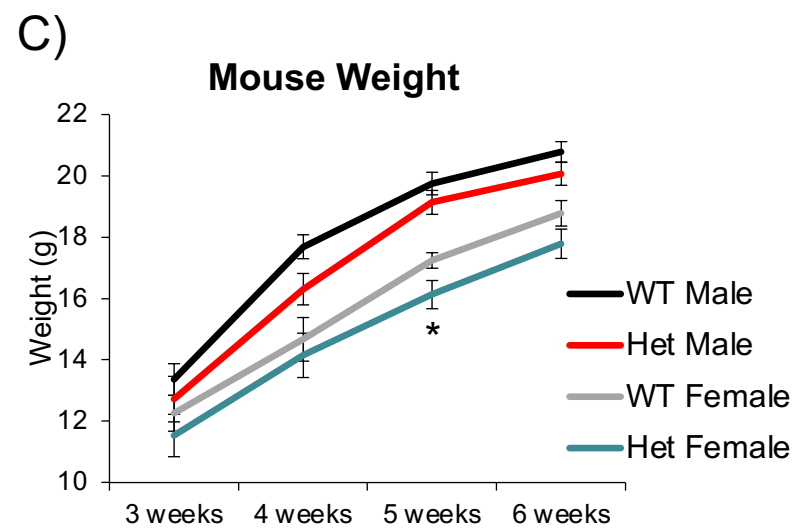

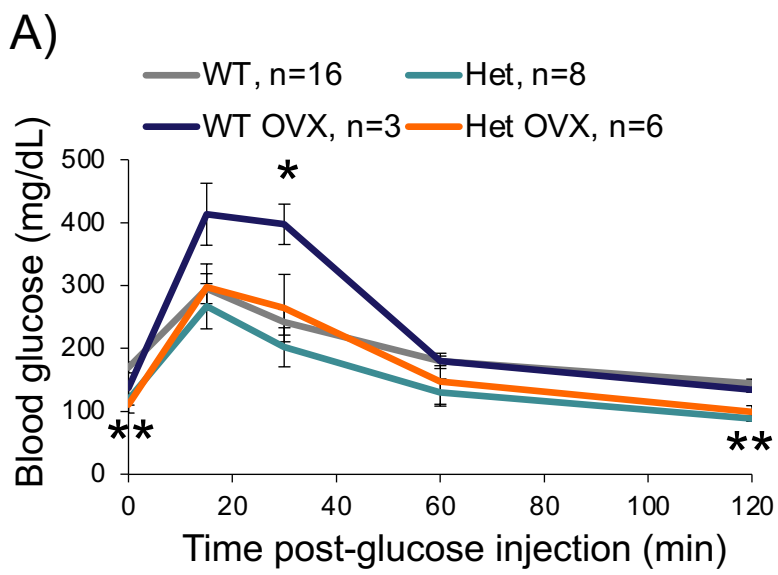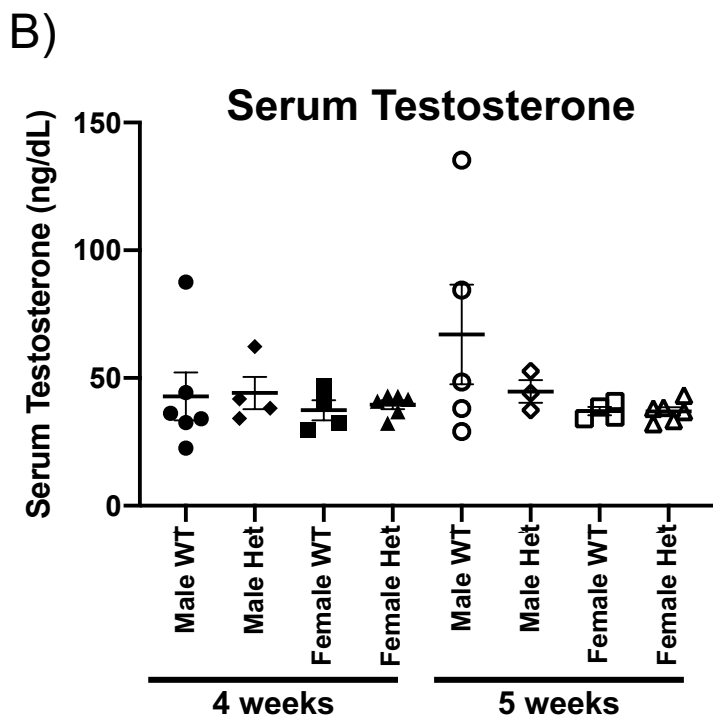

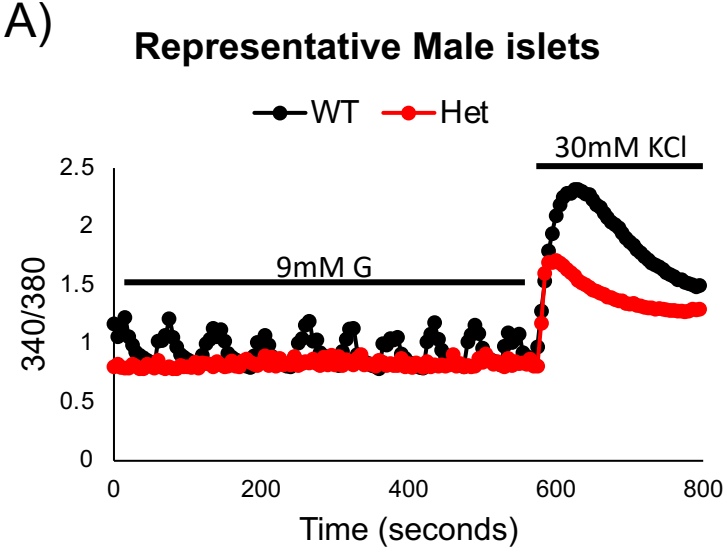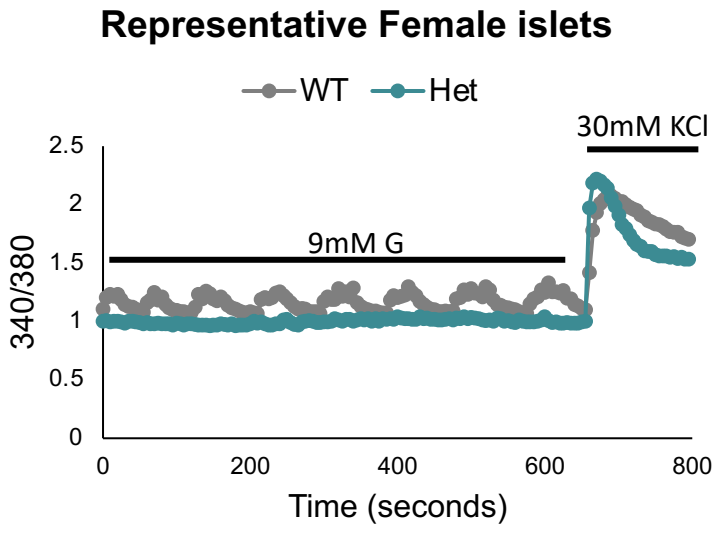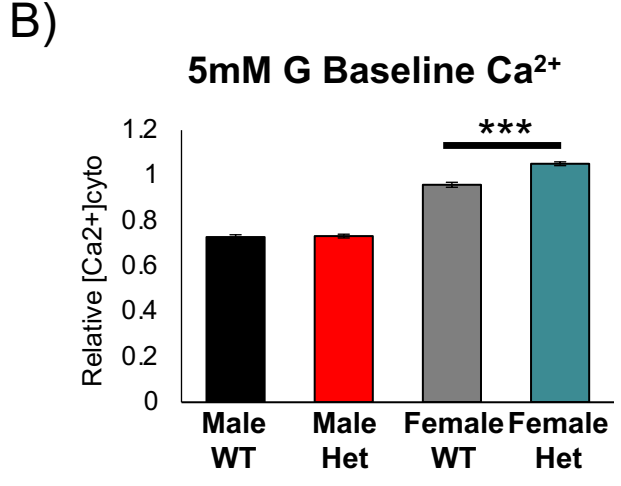

Supplemental Figure 8



A)

## 5 week Female Islets

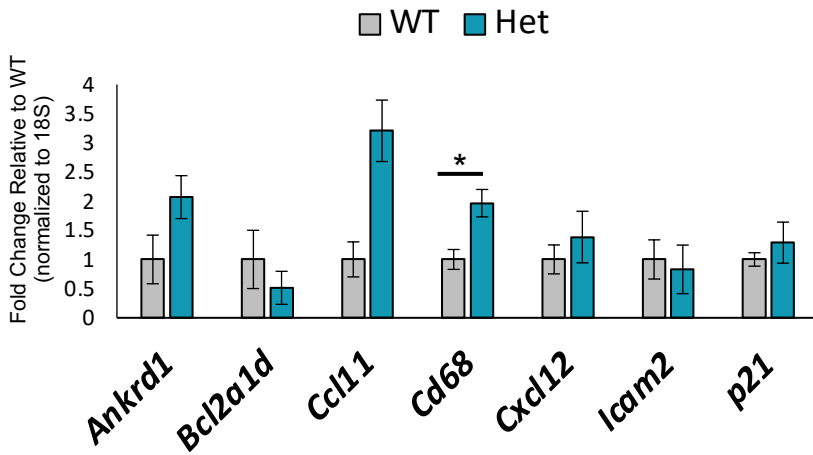

B)

## 5 week Female Islets

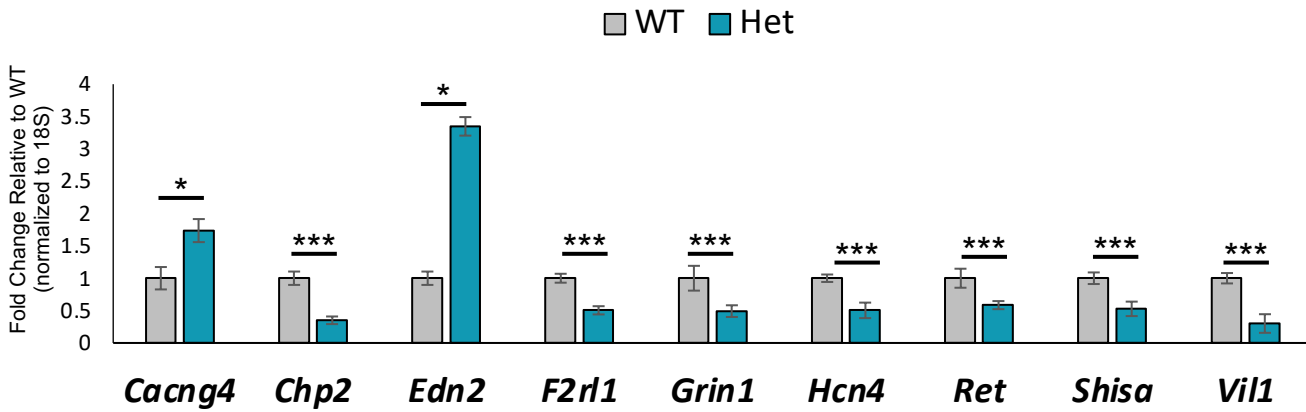

C)

## 5 week Male Islets

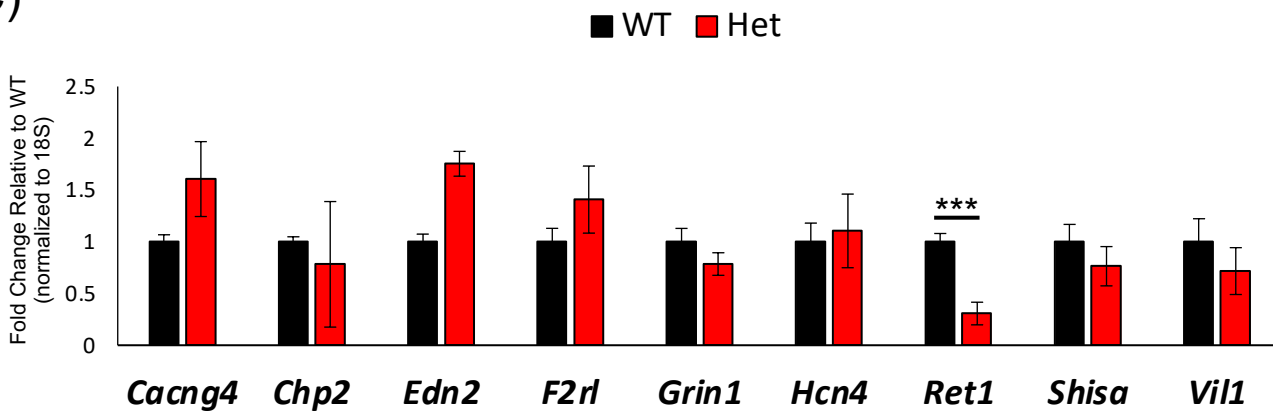

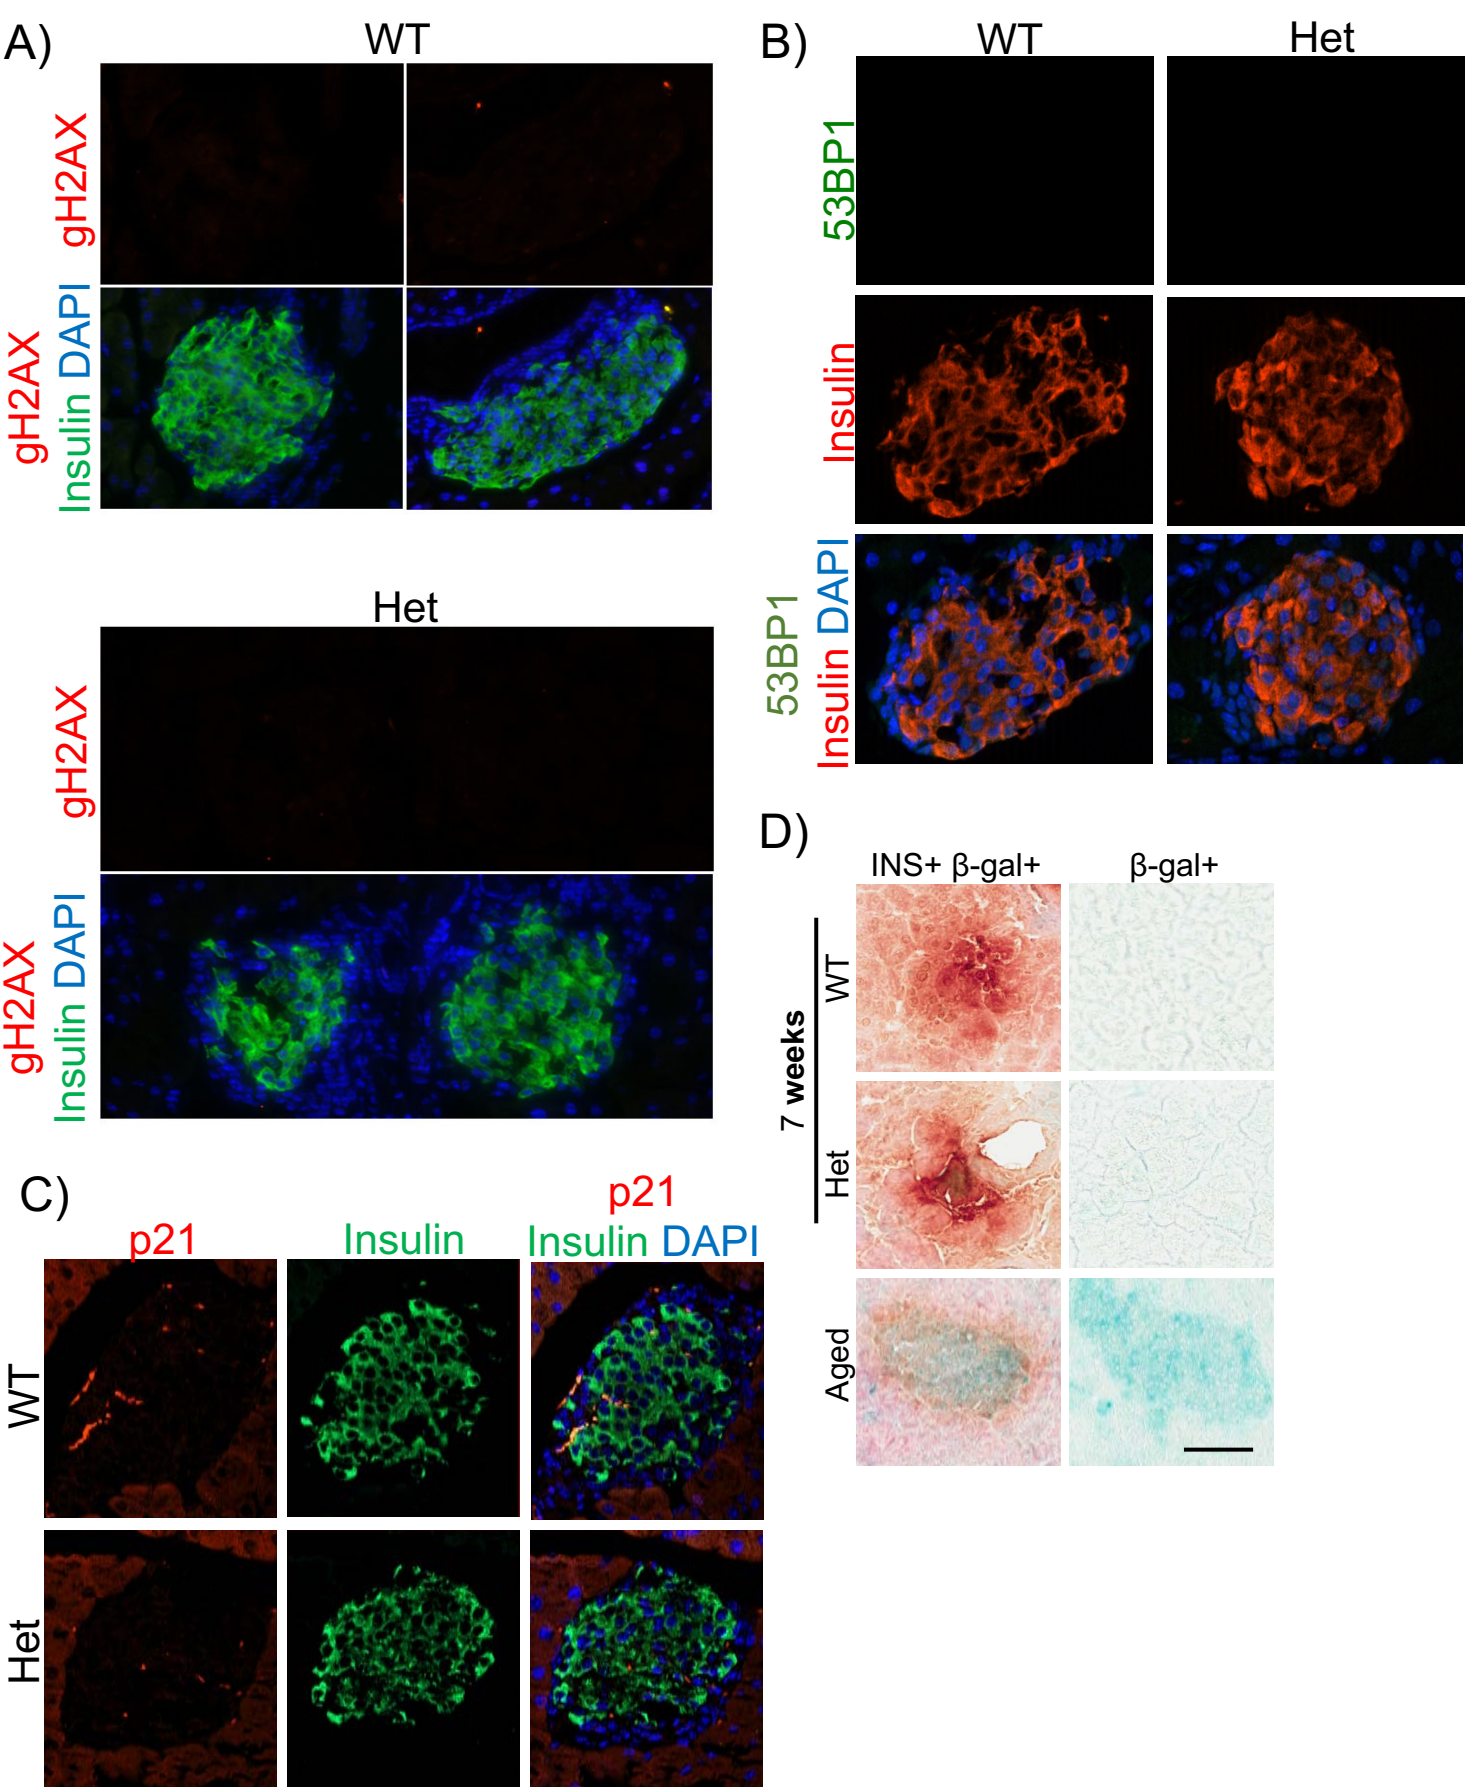

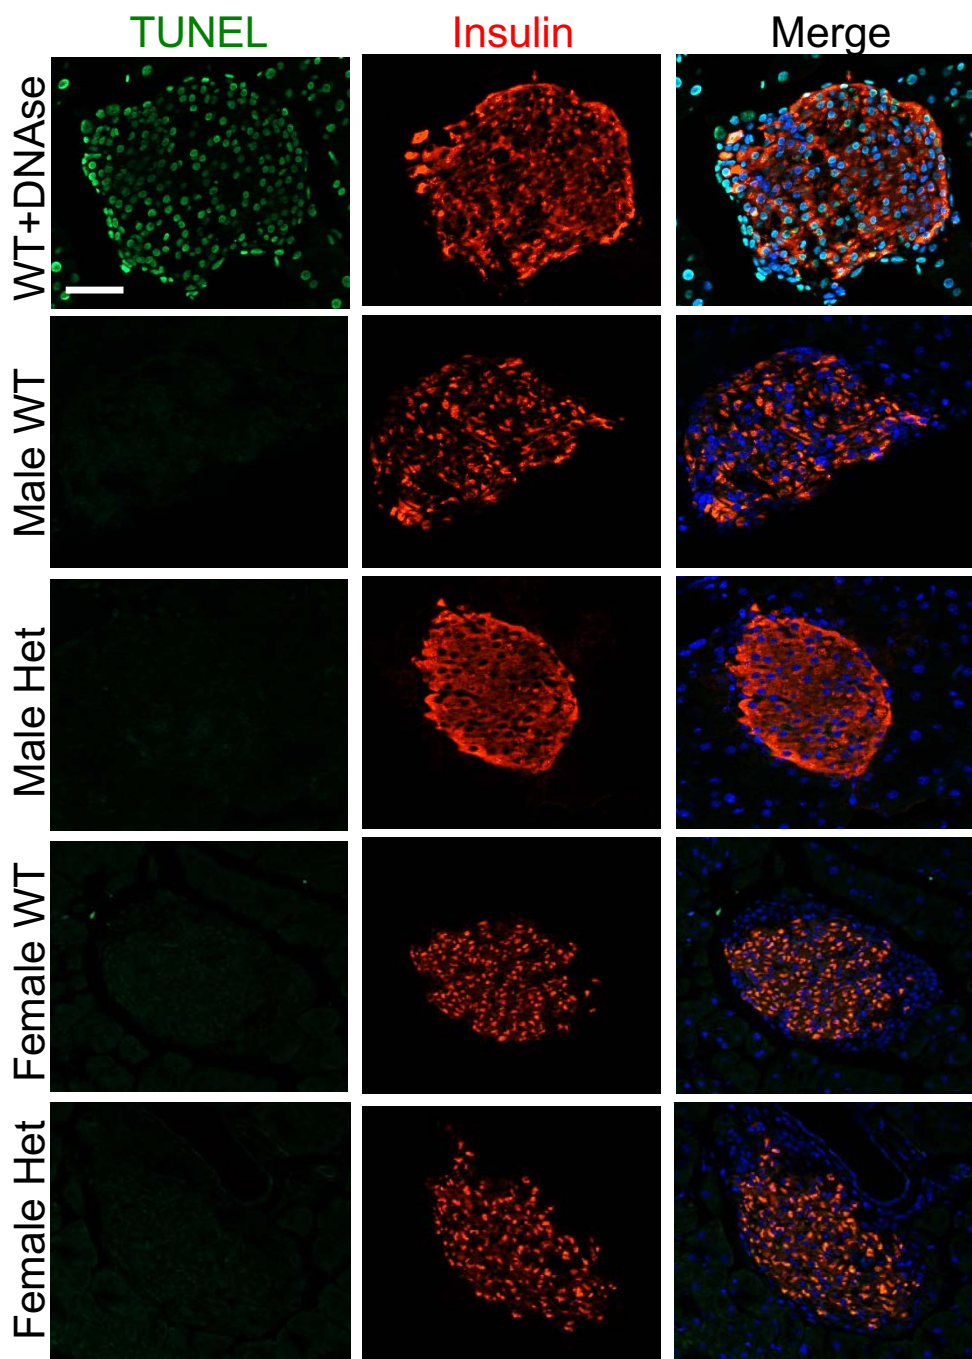

Supplemental Figure 11

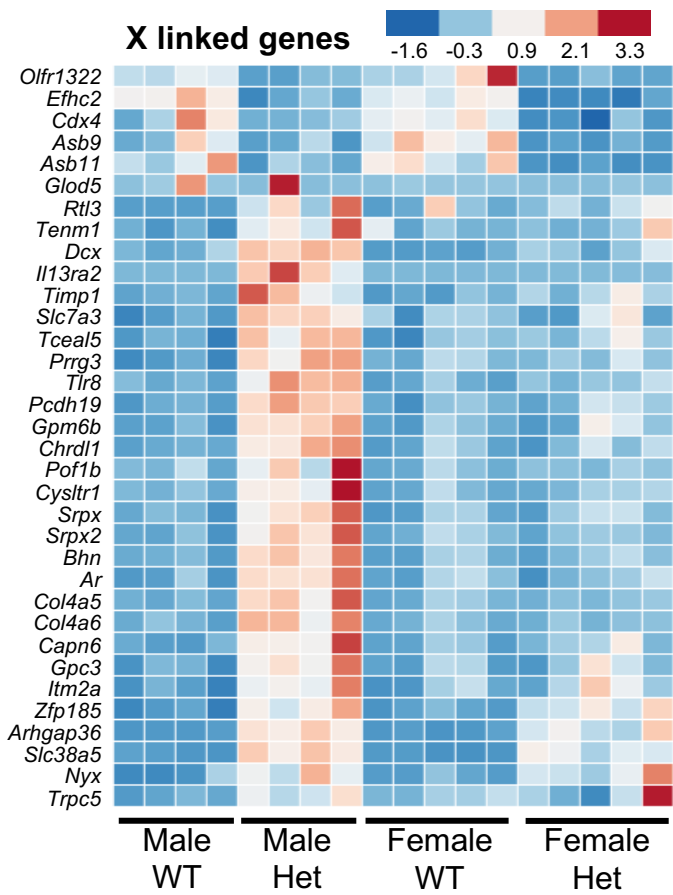

Supplemental Figure 12

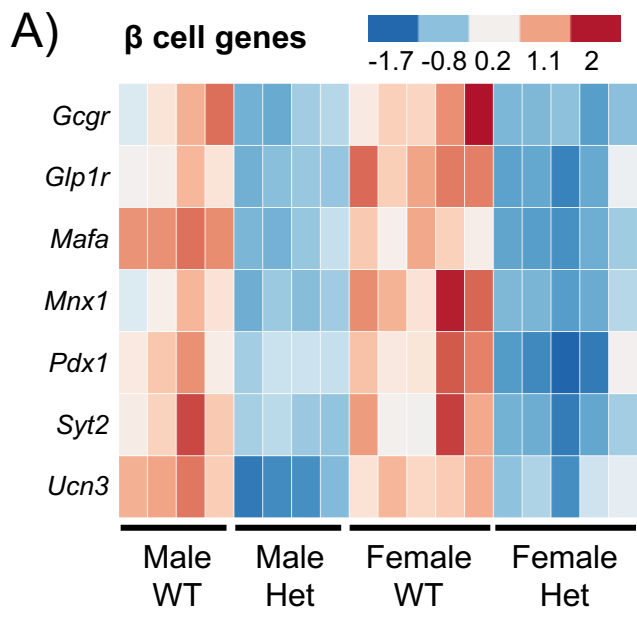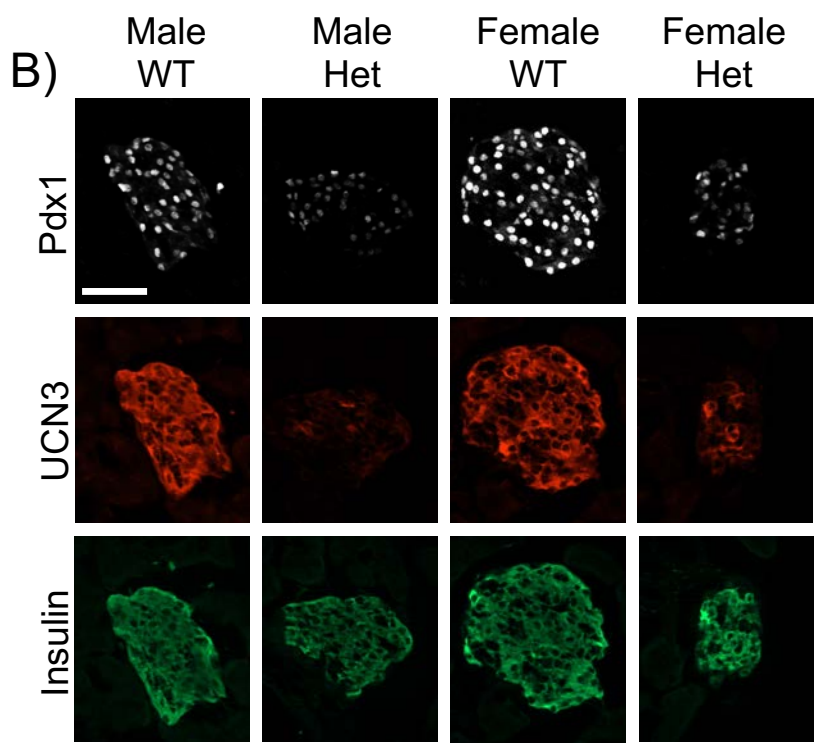

## Supp Table 1: Antibody information

| Antibody      | Host species | Source          | Catalog # | Application | Concentration |
|---------------|--------------|-----------------|-----------|-------------|---------------|
| Insulin       | guinea Pig   | Thermo Fisher   | PA1 26938 | IF/IHC      | 1 to 500      |
| Glucagon      | mouse        | Sigma           | G2654     | IF/IHC      | 1:4000        |
| Ki67          | mouse        | BD Biosciences  | 550609    | IF          | 1:1000        |
| DAPI          | n/a          | SouthernBiotech | 0100-20   | IF          | n/a           |
| MAFA          | rabbit       | Cell Signaling  | 79737     | IF          | 1:20,000      |
| Pdx-1         | goat         | Wright lab      | n/a       | IF          | 1:20,000      |
| UCN3          | rabbit       | Phoenix         | H-019-29  | IF          | 1:500         |
| p21           | rat          | abcam           | ab107099  | IF          | 1:200         |
| 53BP1         | rabbit       | Bethyl          | A300-272A | IF          | 1:400         |
| $\gamma$ H2AX | rabbit       | abcam           | ab81299   | IF          | 1:4000        |
|               |              |                 |           |             |               |

Tunel assay kit: "In Situ Cell Death Detection Kit Fluorescein", (Roche, Cat# 11684795910)

## Supp Table 2: Primer information

| Mouse primers   | Forward                 | Reverse                     |
|-----------------|-------------------------|-----------------------------|
| <i>MafA</i>     | CCTGTAGAGGAAGCCGAGGAA   | CCTCCCCAGTCGAGTATAGC        |
| <i>Ins1</i>     | CACTTCCT ACCCTGCTGG     | ACCACAAAGATGCTGTTTGACA      |
| <i>pre-Ins2</i> | GGGGAGCGTGGCTTCTTCTA    | GGGGACAGAATTCAGTGGCA        |
| <i>Ins2</i>     | CCACCCAGGCTTTTGTCAA     | CCCAGCTCCAGTTGTTCCAC        |
| <i>Pdx1</i>     | CGGCTGAGCAAGCTAAGGTT    | TGGAAGAAGCGCTCTCTTTGA       |
| <i>Ucn3</i>     | AGCACCCGGTACAGATACCAA   | GGCCTTGTGATGTTGAAGAG        |
| <i>Ankrd1</i>   | AAACGGACGGCACTCCACCG    | CGCTGTGCTGAGAAGCTTGCTCT     |
| <i>Bcl2a1d</i>  | GTATATCCACTCCCTGGCTGAG  | TAGTCACAATCCTTCCCCAGTT      |
| <i>Ccl11</i>    | TCCACAGCGCTTCTATTCTG    | GGAGCCTGGGTGAGCCA           |
| <i>Cd68</i>     | ACTTCGGGCCATGTTTCTCT    | GCTGGTAGGTTGATTGTCGT        |
| <i>Cxcl12</i>   | CAGTAGCGGTAACCCAGTCAGC  | TGGCGATGTGGCTCTCG           |
| <i>Icam1</i>    | CAATTTCTCATGCCGCACAG    | AGCTGGAAGATCGAAAGTCCG       |
| <i>p21</i>      | GCCTTAGCCCTACTCT TG     | AGCTGGCCTTAGAGGTGACA        |
| <i>Cacng4</i>   | TCCGGAAGACGGGACTAC      | ATGATGTTGTGGCGTGTCTTG       |
| <i>Chp2</i>     | CGCCTAGACCTCCAGCAGATC   | GCCTGCGAAATACAGTCTCTGAC     |
| <i>Edn2</i>     | CTGGCAAGATGTGGACTGCTGA  | GCCTTTCTGTACCTCTGGCT        |
| <i>F2r1</i>     | CGGACCCGAGAACCTTGACCCG  | GTGAGGATGGACGCAGAGAAT       |
| <i>Grin1</i>    | CCTTTTCAGAGCACACTGTGGCT | CCAGGAAAACCATGGCAGAG        |
| <i>Hcn4</i>     | CGTGCTCACTAAGGGCAACAAAG | GCACCTCATTGAAGTTGTCCACG     |
| <i>Ret</i>      | TTCCAGCATCAACTGCACTG    | GTCAGTGGCTACCACCGTGT        |
| <i>Shisa2</i>   | TGGCACAACGACCGCCAGCAG   | TGAAGGCAACGAACACTGAGCC      |
| <i>Vil1</i>     | TTCTACGGTGGTACTGCTACC   | TGGTCCAACAGGACGGCTTGAT      |
| <i>β-Actin</i>  | AGGTCATCACTATTGGCAACGA  | CACCTTCATGATGGAATTGAATGATGT |

| Human primers | Forward                     | Reverse                       |
|---------------|-----------------------------|-------------------------------|
| <i>MAFA</i>   | GAGAGCGAGAAGTGCCAACCT       | TTCTCCTTGTACAGGTCCCG          |
| <i>MAFB</i>   | CATAGAGAACGTGGCAGCAA        | ATGCCCGGAACCTTTTCTTT          |
| <i>INS</i>    | AGAGGCCATCAAGCAGATCACTGT    | ACAGGTGTTGGTTCACAAAGGCTG      |
| <i>ANKRD1</i> | AGACTCCTTCAGCCAACATGATG     | CTCTCCATCTCTGAAATCCTCAGG      |
| <i>BCL2A1</i> | GGATAAGGCAAAACGGAGGCTG      | CAGTATTGCTTCAGGAGAGATAGC      |
| <i>CCL11</i>  | GCTACAGGAGAATCACCAGTGG      | GGAATCCTGCACCCACTTCTTC        |
| <i>CD68</i>   | CGAGCATCATTCTTACCAGCT       | ATGAGAGGCAGCAAGATGGACC        |
| <i>CXCL12</i> | CTCAACACTCCAACCTGTGCC       | CTCCAGTACTCCTGAATCCAC         |
| <i>ICAM1</i>  | AGCGGCTGACGTGTGCAGTAAT      | TCTGAGACCTCTGGCTTCGTCA        |
| <i>P21</i>    | CCT GTC ACT GTC TTG TAC CCT | GCG TTT GGA GTG GTA GAA ATC T |
| <i>BCL2</i>   | ATCGCCCTGTGGATGACTGAGT      | GCCAGGAGAAATCAAACAGAGGC       |
| <i>CXCL2</i>  | GGCAGAAAGCTTGTCTCAACCC      | CTCCTTCAGGAACAGCCACCAA        |
| <i>ICAM3</i>  | AGATCGTCTGCAACGTGACCCT      | TCGCTGAGGTTACAATGGGTC         |
| <i>IGFBP2</i> | CGAGGGCACTTGTGAGAAGCG       | TGTTTCATGGTGTGCTCCACGTG       |
| <i>IGFBP4</i> | GAGCTGGGTGACACTGCTTG        | CCCACGAGGACCTCTACATCA         |
| <i>IGF1R</i>  | CTCCTGTTTCTCTCCGCCG         | ATAGTCGTTGCGGATGTCGAT         |
| <i>GAPDH</i>  | CTCACCGGATGCACCAATGTT       | CGCGTTGCTCACAATGTTTCAT        |

**Supplemental Figure 1: Glucose tolerance phenotypes were stably maintained in male and female *MafA*<sup>S64F/+</sup> mice.** GTT was performed in 3-, 6-, 7-, and 16-week-old mice. Glucose (2mg/kg) was injected following a 6 hour fast and blood glucose was measured at the indicated time points. \*p<0.05; \*\*p<0.01; \*\*\*p<0.001

**Supplemental Figure 2: Homozygous male *MafA*<sup>S64F/S64F</sup> mice were hyperglycemic, with glucose tolerance and blood glucose levels worsening with age.** A) *MafA*<sup>S64F/S64F</sup> mice showed progressively worsening glucose tolerance and fasting blood glucose levels between 5 to 10 weeks of age. B) Fasting blood glucose levels in homozygous male mutant mice increased significantly over time. C) Female S64F *MafA* homozygous mice were only mildly glucose intolerant at 10 weeks of age although their temporal responses to glucose was variable between animals. D) Chi-square analysis revealed that *MafA*<sup>S64F/S64F</sup> male and female animals were observed with significantly less frequency at weaning than WT animals. In contrast, *MafA*<sup>S64F/+</sup> numbers were as expected. \*p<0.05; \*\*p<0.01; \*\*\*p<0.001.

**Supplemental Figure 2: Female *MafA*<sup>S64F/+</sup> islets secreted more insulin in response to low or high glucose.** A) Islet perfusion demonstrated islets from *MafA*<sup>S64F/+</sup> female mice secreted higher levels of insulin at low (G 5.6) and high (G 16.7) glucose and in response to KCl. B) Serum insulin levels (ng/mL) were increased in 6-hour fasted female Het animals while male Het levels were unchanged.

**Supplemental Figure 4: Glucagon secretion was compromised in male and female *MafA*<sup>S64F/+</sup> mice.** A) Glucagon secretion was decreased in S64F *MafA* Het islets, which were incubated in 4.6 mM (LG) and 16.7 mM (HG) glucose for 1 hour prior to collection. Secretion was normalized to glucagon content (B), which was unchanged. Content was normalized to DNA. C) Islet  $\alpha$  cell area was reduced in male S64F *MafA* Het mice, though measurements were highly variable between samples. Islet  $\alpha$  cell area was calculated by dividing the total glucagon<sup>+</sup> area by the total pancreas area (eosin staining) multiplied by 100 to obtain percent (%). \*p<0.05.

**Supplemental Figure 5: Islet  $\beta$  cell proliferation at 4 weeks of age was reduced in both male and female *MafA*<sup>S64F/+</sup> mice.** A) Representative islets stained for insulin, Ki67 (proliferation marker), and DAPI (nuclei). Islet  $\beta$  cell proliferation was calculated by dividing the number of Ki67<sup>+</sup> cells by total insulin<sup>+</sup>  $\beta$  cells. Greater than 1000  $\beta$  cells were counted per sample. \*p<0.05.

**Supplemental Figure 6: Insulin tolerance and glycogen content are unaltered in *MafA*<sup>S64F/+</sup> animals.** A) Insulin tolerance was unchanged at 4 and 5 weeks in Het animals once corrected for initial fasted blood glucose levels (Percent of 0 min). Insulin (0.5U/kg body weight) was injected following a 6 hour fast. B) Glycogen content in muscle (soleus) and liver was also unaffected in 7 week-old S64F *MafA* Het mice. Glycogen content was normalized to wet tissue weight. C) There was no change in average body weight between 3-6 weeks except a small decrease (-1.07 fold) in female S64F *MafA* Het mice at 5 weeks of age. N=5/group, \*p<0.05.

**Supplemental Figure 7: Ovariectomy (OVX) did not alter glucose tolerance in female *MafA*<sup>S64F/+</sup> mice, nor are testosterone levels changed.** A) Compared to 4 week-old control mice (i.e. non OVX: WT, grey line; Het, teal line), the GTT at 1-week post ovariectomy showed glucose intolerance in WT female mice (WT OVX, purple line) and no change in S64F *MafA* Het. \*p<0.05; \*\*p<0.01. B) Serum testosterone levels were unchanged in male or female S64F *MafA* Het. Male and female testosterone levels are similar at 4 and 5 weeks of age.

**Supplemental Figure 8: Male *MafA*<sup>S64F/+</sup> islets had a reduced response to KCl stimulation, while female Het islets had an increased KCl response and baseline Ca<sup>2+</sup>.** A) Representative Ca<sup>2+</sup> traces quantitated in Figure 4C in response to both high glucose (9 mM) and KCl (30 mM). B) Female S64F *MafA* Het islets have increased baseline Ca<sup>2+</sup> at 5mM compared with WT islets (right) while male Het islets do not (left).



**Supplemental Figure 9: qPCR confirmation of changes in islet gene expression identified by RNA-seq.** A) Senescence markers were primarily unchanged in female *MafA*<sup>S64F/+</sup> islets. B) Gene altered specifically in female *MafA*<sup>S64F/+</sup> islets identified by RNA-seq were unchanged in male *MafA*<sup>S64F/+</sup> islets (C). \*p<0.05; \*\*\*p<0.001.

**Supplemental Figure 10: DNA damage and cell cycle inhibition markers were not detected in 5-week-old female *MafA*<sup>S64F/+</sup> islets.** Immunostaining for  $\gamma$ H2AX and 53BP1 (DNA double strand break; A-B), p21 (cell cycle inhibitor; C), and endogenous SA- $\beta$ -gal (senescence marker; D) were not detected in female Het islets.

**Supplemental Figure 11: Significant levels of apoptosis was not found in *MafA*<sup>S64F/+</sup> islet cells.** TUNEL<sup>+</sup> nuclei were barely detected in S64F MafA Het islets at 6 weeks of age but easily visible in DNase treated controls (top panels).

**Supplemental Figure 12: Many X chromosome linked genes were altered in male *MafA*<sup>S64F/+</sup> islets.** Heat map developed from the 5-week-old RNA-Seq data. FDR<0.05.

**Supplemental Figure 13: Production of some  $\beta$  cell identity gene products are downregulated in *MafA*<sup>S64F/+</sup> islets.** A) Heat map showing  $\beta$  identity genes decreased in both male and female Het islets. FDR<0.05. B) Immunostaining illustrating decreased Pdx1 and UCN3 protein levels in 7-week-old S64F MafA Het islets.
